# Supplementary material for: Short-term efficacy after switching from adefovir dipivoxil and tenofovir disoproxil fumarate therapy to tenofovir alaferamide for chronic hepatitis B
Source: PubMed Central journal article supplement — Biomed Rep. 2020 Nov 12;14(1):12. doi: 10.3892/br.2020.1388 (PMC7678628; doi:10.3892/br.2020.1388), 2020-11-12
Supplement: Supplementary_Data.pdf [file Supplementary_Data.pdf]

Table SI. Treatment history with NAs in all cases.

| Case number | NA regimen 1 | NA regimen 2 | NA regimen 3 | NA regimen 4 | NA regimen 5 | NA regimen 6 | Duration of all NA treatments, years |
|-------------|--------------|--------------|--------------|--------------|--------------|--------------|--------------------------------------|
| 1           | LAM          | LAM+ADV      | TAF          |              |              |              | 14.0                                 |
| 2           | LAM          | LAM+ADV      | ADV          | TDF          | TAF          |              | 18.5                                 |
| 3           | LAM          | LAM+ADV      | LAM+TAF      |              |              |              | 13.3                                 |
| 4           | LAM          | LAM+ADV      | TAF          |              |              |              | 15.8                                 |
| 5           | LAM          | LAM+ADV      | LAM+TDF      | TAF          |              |              | 13.5                                 |
| 6           | LAM          | LAM+ADV      | ETV+ADV      | ETV+TDF      | TAF          |              | 17.7                                 |
| 7           | LAM          | LAM+ADV      | LAM+TDF      | LAM+TAF      |              |              | 13.7                                 |
| 8           | LAM          | LAM+ADV      | LAM+TAF      |              |              |              | 22.3                                 |
| 9           | LAM          | LAM+ADV      | LAM+TAF      |              |              |              | 18.1                                 |
| 10          | LAM          | ETV          | LAM+ADV      | LAM+TDF      | ETV+TDF      | ETV+TAF      | 13.0                                 |
| 11          | LAM          | LAM+ADV      | LAM+TAF      |              |              |              | 17.3                                 |
| 12          | LAM          | LAM+ADV      | ETV+ADV      | ETV+TAF      |              |              | 17.3                                 |
| 13          | LAM          | LAM+ADV      | ADV          | LAM+ADV      | LAM+TDF      | LAM+TAF      | 15.9                                 |
| 14          | LAM          | LAM+ADV      | LAM+TDF      | LAM+TAF      |              |              | 18.3                                 |
| 15          | LAM          | LAM+ADV      | ADV          | TDF          | TAF          |              | 16.6                                 |
| 16          | LAM          | LAM+ADV      | LAM+TDF      | TAF          |              |              | 15.2                                 |
| 17          | LAM          | ETV          | LAM+ADV      | LAM+TDF      | LAM+TAF      |              | 16.4                                 |
| 18          | LAM          | LAM+ADV      | ADV          | TAF          |              |              | 14.7                                 |
| 19          | LAM          | LAM+ADV      | LAM+TDF      | TAF          |              |              | 13.3                                 |
| 20          | ETV          | TDF          | TAF          |              |              |              | 4.6                                  |
| 21          | ETV          | TDF          | TAF          |              |              |              | 8.4                                  |
| 22          | ETV          | ETV+TDF      | ETV+TAF      |              |              |              | 7.7                                  |
| 23          | ETV          | ETV+TDF      | ETV+TAF      |              |              |              | 0.8                                  |
| 24          | ETV          | TDF          | TAF          |              |              |              | 5.7                                  |
| 25          | ETV          | ETV+ADV      | ETV+TDF      | ETV+TAF      |              |              | 8.4                                  |
| 26          | ETV          | ETV+ADV      | ETV+TAF      |              |              |              | 4.7                                  |
| 27          | ETV          | ETV+TDF      | ETV+TAF      |              |              |              | 5.8                                  |
| 28          | ETV          | TDF          | TAF          |              |              |              | 7.0                                  |
| 29          | TDF          | TAF          |              |              |              |              | 1.3                                  |
| 30          | TDF          | TAF          |              |              |              |              | 1.7                                  |
| 31          | TDF          | TAF          |              |              |              |              | 2.8                                  |
| 32          | TDF          | TAF          |              |              |              |              | 1.8                                  |
| 33          | TDF          | TAF          |              |              |              |              | 3.7                                  |

ADV, adefovir dipivoxil; ETV, entecavir; LAM, lamivudine; NA, nucleos(t)ide analogs; TAF, tenofovir alafenamide; TDF, tenofovir disoproxil fumarate.
